# Supplementary material
Source: MDPI journal article supplement (https://www.mdpi.com/2227-9717/9/9/1652)
Supplement: s1 [file s1]

## Supplementary Materials

### 1. Calculation of dielectric constant ( $\epsilon_m$ ) of solvent mixtures

The calculation of  $\epsilon_m$  for a solvent mixture [1,2] was done on the basis of  $\epsilon$  of every solvent contained in the mixture by using the following equation:

$$\epsilon_m = \sum_{i=1}^3 \epsilon_i \phi_i, i = 1, 2, 3$$

where  $\epsilon_i$  is dielectric constant of a solvent, and  $\phi_i$  is a volume fraction of a solvent in the mixture.

Dielectric constants of the used solvents at 80 °C (353.15 K) were calculated by using following equations [3]:

$$\epsilon(T) = a - b \times T + c \times (T)^2$$

Ethanol:  $\epsilon_{(353.15)} = 151.45 - 0.87020 \times 353.15 + 0.001957 \times (353.15)^2$

$$\epsilon_{(353.15)} = 88.21$$

Acetone:  $\epsilon_{(353.15)} = 88.157 - 0.34300 \times 353.15 + 0.00038925 \times (353.15)^2$

$$\epsilon_{(353.15)} = 15.57$$

Water:  $\epsilon_{(353.15)} = 249.21 - 0.79069 \times 353.15 + 0.00072997 \times (353.15)^2$

$$\epsilon_{(353.15)} = 61.02$$

### 2. Calculation of relative polarity ( $RP_m$ ) of solvent mixtures

The calculation of  $RP_m$  for a solvent mixture was done on the basis of relative polarity of every solvent contained in the mixture on the basis of the following equation [4]:

$$RP_m = \sum_{i=1}^3 RP_i \phi_i, i = 1, 2, 3$$

where  $RP_i$  is a relative polarity of a solvent and  $\phi_i$  is a volume fraction of a solvent in the mixture.

$$RP(\text{ethanol}) = 0.654, RP(\text{acetone}) = 0.355, RP(\text{water}) = 1.000 [5]$$

### 3. Calculation of density ( $\rho_m$ ) of solvent mixtures

The calculation of  $\rho_m$  of a solvent mixture was done on the basis of density of every solvent contained in the mixture by using the following equation [2]:

$$\rho_m = \sum_{i=1}^3 \rho_i \phi_i, i = 1, 2, 3$$

where  $\rho_i$  is density of a solvent, and  $\phi_i$  is a volume fraction of a solvent in the mixture.

$$\rho(\text{ethanol}, 80\text{ }^\circ\text{C}) = 725.634\text{ g/dm}^3, \rho(\text{acetone}, 80\text{ }^\circ\text{C}) = 720.761\text{ g/dm}^3, \rho(\text{water}, 80\text{ }^\circ\text{C}) = 962.029\text{ g/dm}^3 [6]$$

### 4. Calculation of polarity index ( $P'$ ) of solvent mixtures

Polarity index ( $P'$ ) of a solvent mixture was calculated on the basis of polarity index of every solvent contained in the mixture. The calculation of  $P'_m$  of a solvent mixture was done on the basis of the following equation [7,2]:

$$P'_m = \sum_i P'_i \varphi_i, i = 1, 2, 3$$

where  $P'_i$  is polarity index of a solvent, and  $\varphi_i$  is a volume fraction of a solvent in the mixture.

$P'$  (ethanol) = 5.2,  $P'$  (acetone) = 5.4,  $P'$  (water) = 9.0 [8]

#### References:

1. A. Jouyban, S. Soltanpour, H. K. Chan, A simple relationship between dielectric constant of mixed solvents with solvent composition and temperature, *Int. J. Pharm.* **269** (2004) 353-360.
2. Y. Y. Fialkov, V. L. Chumak, Mixed solvents, in: G. Wypych (Ed.), *Handbook of solvents*, ChemTec Publishing, Toronto, Canada, 2001, pp. 505-564.
3. C. Wohlfarth, Permittivity (Dielectric constant) of liquids, in: D. R. Lide (Ed.), *CRC Handbook of Chemistry and Physics, 90th Edition*, e-version, CRC-Press, Boca Raton, Florida, USA, 2010, pp 6-148.
4. C. Diaz, L. Barrio, J. Catalan, Characterization of ternary solvent mixtures: the methanol/ethanol/acetone mixture, *Chem. Phys. Lett.* **371** (2003) 645-654.
5. C. Reichardt, *Solvents and solvent effects in organic chemistry*, Wwiley Verlag GmbH & Co. KgaA, Weinheim, Germany, 2003.
6. <http://ddbonline.ddbst.de/DIPPR105DensityCalculation/DIPPR105CalculationCGI.exe> (accessed on 18 December 2019)
7. C. F. Poole, S. K. Poole, *Chromatography Today*, Elsevier, Amsterdam, Netherlands, 1991.
8. L. B. Kier, Quantitation of solvent polarity based on molecular structure, *J. Pharm. Sci.* **70** (1981) 930-933.

**Table S1.** The normalized data used in the SRD analysis of extraction experiments.

| Experiment | Solvent volume fraction (v/v) |         |        | $\varepsilon_m$ | $RP_m$ | $\rho_m(\text{g/dm}^3)$ | $P'_m$ | $T_{\text{Car}}$<br>(mg/100 ml) |
|------------|-------------------------------|---------|--------|-----------------|--------|-------------------------|--------|---------------------------------|
|            | Ethanol                       | Acetone | Water  |                 |        |                         |        |                                 |
| <b>1</b>   | 0.7940                        | 0.0100  | 0.9900 | 0.9166          | 0.9900 | 0.9900                  | 0.8196 | 0.0112                          |
| <b>2</b>   | 0.0100                        | 0.7940  | 0.9900 | 0.1326          | 0.3533 | 0.9167                  | 0.9900 | 0.5683                          |
| <b>3</b>   | 0.0100                        | 0.7940  | 0.9900 | 0.1326          | 0.3533 | 0.9167                  | 0.9900 | 0.5354                          |
| <b>4</b>   | 0.2060                        | 0.5980  | 0.9900 | 0.3286          | 0.5125 | 0.9351                  | 0.9474 | 0.2431                          |
| <b>5</b>   | 0.4020                        | 0.4020  | 0.9900 | 0.5246          | 0.6717 | 0.9534                  | 0.9048 | 0.1082                          |
| <b>6</b>   | 0.5980                        | 0.2060  | 0.9900 | 0.7206          | 0.8308 | 0.9717                  | 0.8622 | 0.0456                          |
| <b>7</b>   | 0.7940                        | 0.0100  | 0.9900 | 0.9166          | 0.9900 | 0.9900                  | 0.8196 | 0.0100                          |
| <b>8</b>   | 0.4020                        | 0.4020  | 0.9900 | 0.5246          | 0.6717 | 0.9534                  | 0.9048 | 0.0933                          |
| <b>9</b>   | 0.9900                        | 0.0100  | 0.0100 | 0.9900          | 0.8058 | 0.1016                  | 0.0100 | 0.7633                          |
| <b>10</b>  | 0.0100                        | 0.9900  | 0.0100 | 0.0100          | 0.0100 | 0.0100                  | 0.2230 | 0.4509                          |
| <b>11</b>  | 0.0100                        | 0.9900  | 0.0100 | 0.0100          | 0.0100 | 0.0100                  | 0.2230 | 0.4474                          |
| <b>12</b>  | 0.2550                        | 0.7450  | 0.0100 | 0.2550          | 0.2090 | 0.0329                  | 0.1698 | 0.8067                          |
| <b>13</b>  | 0.5000                        | 0.5000  | 0.0100 | 0.5000          | 0.4079 | 0.0558                  | 0.1165 | 0.8157                          |
| <b>14</b>  | 0.7450                        | 0.2550  | 0.0100 | 0.7450          | 0.6069 | 0.0787                  | 0.0633 | 0.9900                          |
| <b>15</b>  | 0.9900                        | 0.0100  | 0.0100 | 0.9900          | 0.8058 | 0.1016                  | 0.0100 | 0.7601                          |
| <b>16</b>  | 0.5000                        | 0.5000  | 0.0100 | 0.5000          | 0.4079 | 0.0558                  | 0.1165 | 0.8997                          |
| <b>Opt</b> | 0.6333                        | 0.3667  | 0.0100 | 0.6333          | 0.5161 | 0.0682                  | 0.0875 | 0.9282                          |

**Table S2.** The input matrix used in the SRD modeling

| Experiment      | 1      | 2      | 3      | 4      | 5      | 6      | 7      | 8      | 9      | 10     | 11     | 12     | 13     | 14     | 15     | 16     | <i>Opt</i> * | Read** |
|-----------------|--------|--------|--------|--------|--------|--------|--------|--------|--------|--------|--------|--------|--------|--------|--------|--------|--------------|--------|
| Ethanol         | 0.7940 | 0.0100 | 0.0100 | 0.2060 | 0.4020 | 0.5980 | 0.7940 | 0.4020 | 0.9900 | 0.0100 | 0.0100 | 0.2550 | 0.5000 | 0.7450 | 0.9900 | 0.5000 | 0.6333       | 0.4510 |
| Acetone         | 0.0100 | 0.7940 | 0.7940 | 0.5980 | 0.4020 | 0.2060 | 0.0100 | 0.4020 | 0.0100 | 0.9900 | 0.9900 | 0.7450 | 0.5000 | 0.2550 | 0.0100 | 0.5000 | 0.3667       | 0.4510 |
| Water           | 0.9900 | 0.9900 | 0.9900 | 0.9900 | 0.9900 | 0.9900 | 0.9900 | 0.9900 | 0.0100 | 0.0100 | 0.0100 | 0.0100 | 0.0100 | 0.0100 | 0.0100 | 0.0100 | 0.0100       | 0.5000 |
| $\varepsilon_m$ | 0.9166 | 0.1326 | 0.1326 | 0.3286 | 0.5246 | 0.7206 | 0.9166 | 0.5246 | 0.9900 | 0.0100 | 0.0100 | 0.2550 | 0.5000 | 0.7450 | 0.9900 | 0.5000 | 0.6333       | 0.5123 |
| $RP_m$          | 0.9900 | 0.3533 | 0.3533 | 0.5125 | 0.6717 | 0.8308 | 0.9900 | 0.6717 | 0.8058 | 0.0100 | 0.0100 | 0.2090 | 0.4079 | 0.6069 | 0.8058 | 0.4079 | 0.5161       | 0.5398 |
| $\rho_m$        | 0.9900 | 0.9167 | 0.9167 | 0.9351 | 0.9534 | 0.9717 | 0.9900 | 0.9534 | 0.1016 | 0.0100 | 0.0100 | 0.0329 | 0.0558 | 0.0787 | 0.1016 | 0.0558 | 0.0682       | 0.5046 |
| $P'_m$          | 0.8196 | 0.9900 | 0.9900 | 0.9474 | 0.9048 | 0.8622 | 0.8196 | 0.9048 | 0.0100 | 0.2230 | 0.2230 | 0.1698 | 0.1165 | 0.0633 | 0.0100 | 0.1165 | 0.0875       | 0.5107 |
| $T_{Car}$       | 0.0112 | 0.5683 | 0.5354 | 0.2431 | 0.1082 | 0.0456 | 0.0100 | 0.0933 | 0.7633 | 0.4509 | 0.4474 | 0.8067 | 0.8157 | 0.9900 | 0.7601 | 0.8997 | 0.9282       | 0.4718 |

\*in the first step of the SRD analysis the *Opt* column was not considered

\*\*average row values are calculated on the basis of the data for experiments 1–16
